# Supplementary material for: Large Plasmid Complement Resolved: Complete Genome Sequencing of Lactobacillus plantarum MF1298, a Candidate Probiotic Strain Associated with Unfavorable Effect
Source: MDPI journal article supplement (doi:10.3390/microorganisms7080262), 2019-08-14

## Supplementary material – McLeod MF1298\_Genome\_final - revised

**Figure S1** | *Lactobacillus plantarum* MF1298 plasmids pMF1298-1 to -14.

The next 7 pages represent the full plasmid complement of strain MF1298 by plasmid map overviews with all genes depicted, including locus tags. For a full annotation, the reader is referred to the GenBank assembly accession: GCA\_001880185.2 (NCBI Assembly: ASM188018v2; [https://www.ncbi.nlm.nih.gov/assembly/GCF\\_001880185.2](https://www.ncbi.nlm.nih.gov/assembly/GCF_001880185.2)) and the corresponding GenBank entries (see Table 1 and Table S1).

Certain gene categories, some of which are mentioned in the main text of this article, are highlighted with colors:

1) transposons/recombinases (red); 2) replication/mobilization/conjugation (black); 3) heavy-metal resistance (brown); 4) toxin-antitoxin systems (plasmid maintenance) (yellow); 5) cobalamin turnover (blue); 6) retron-type reverse transcriptases (green); 7) extra-cellular matrix binding protein (purple).

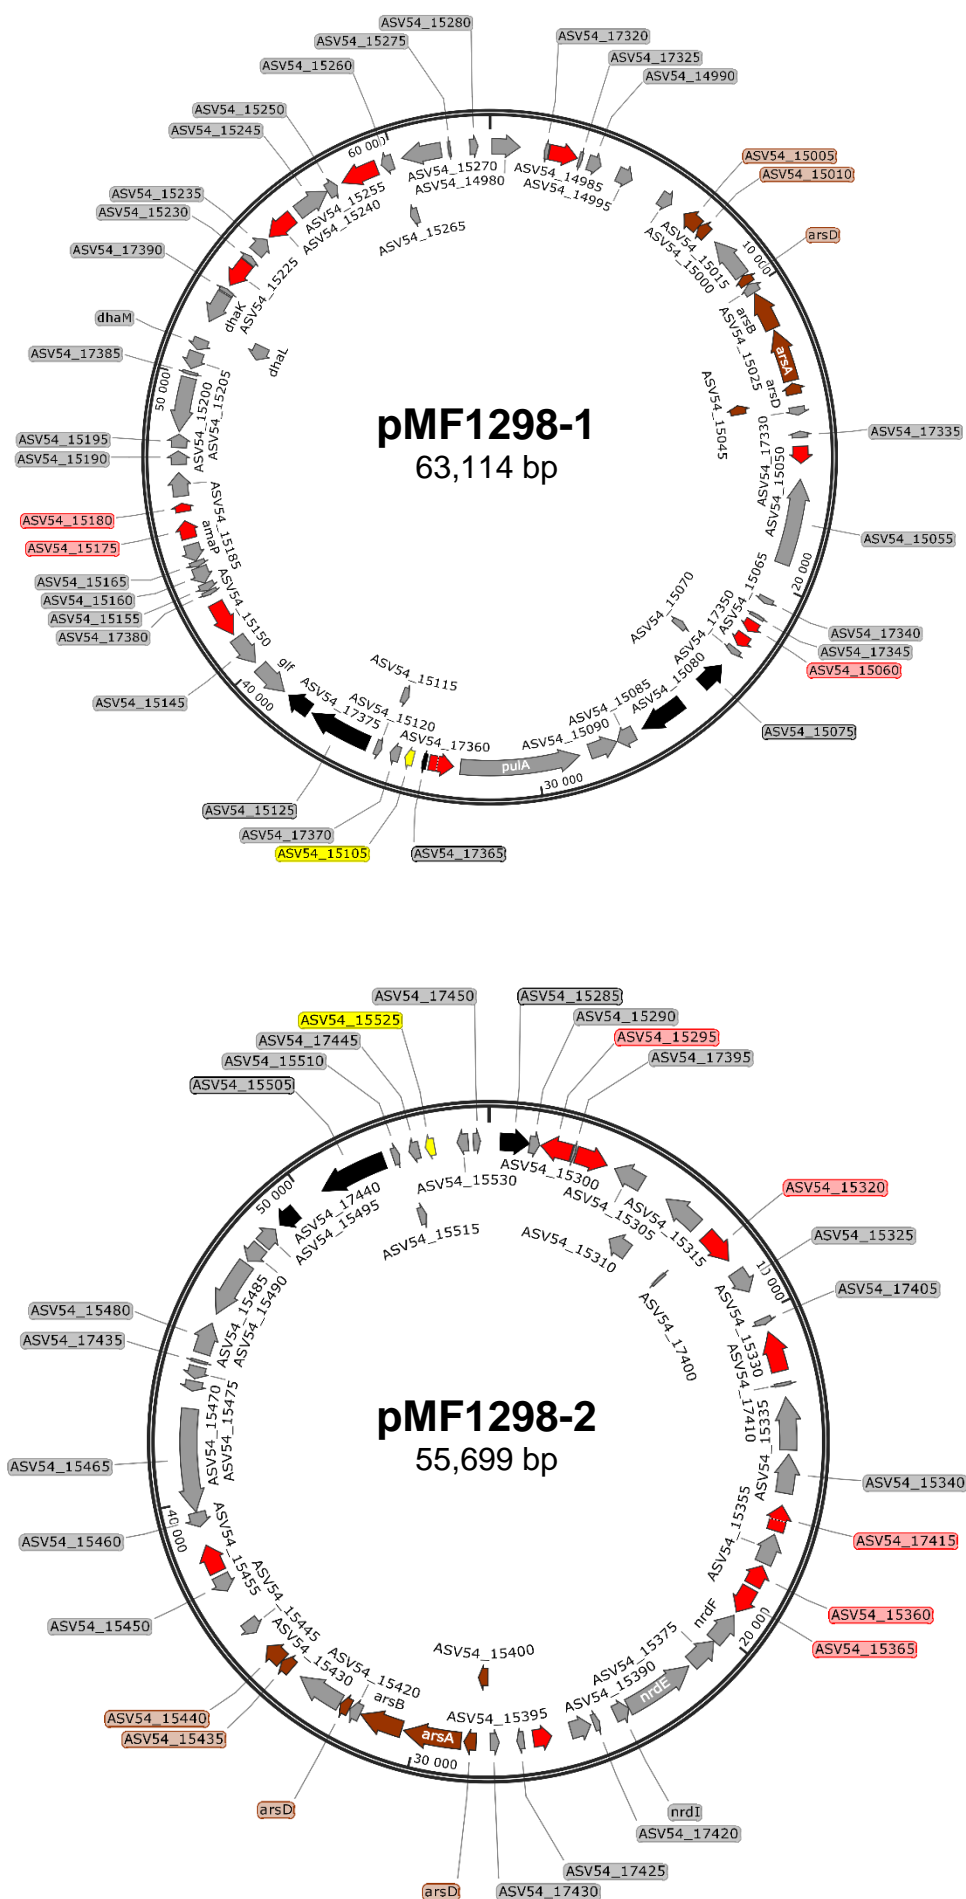

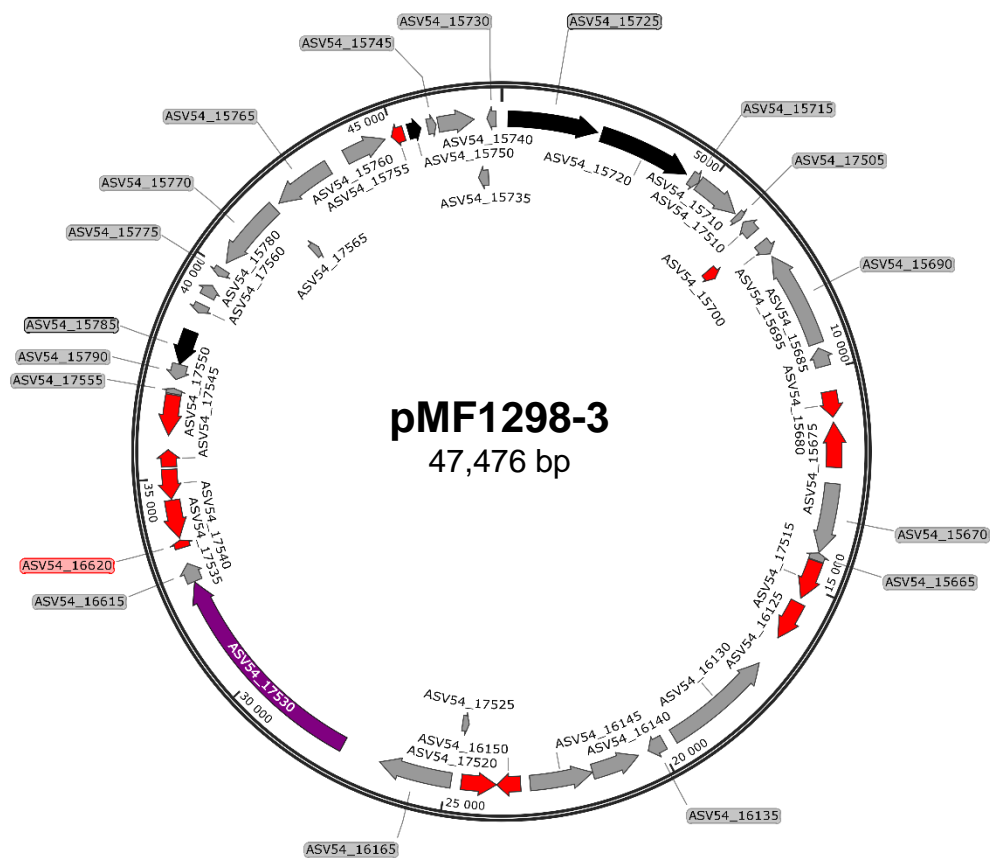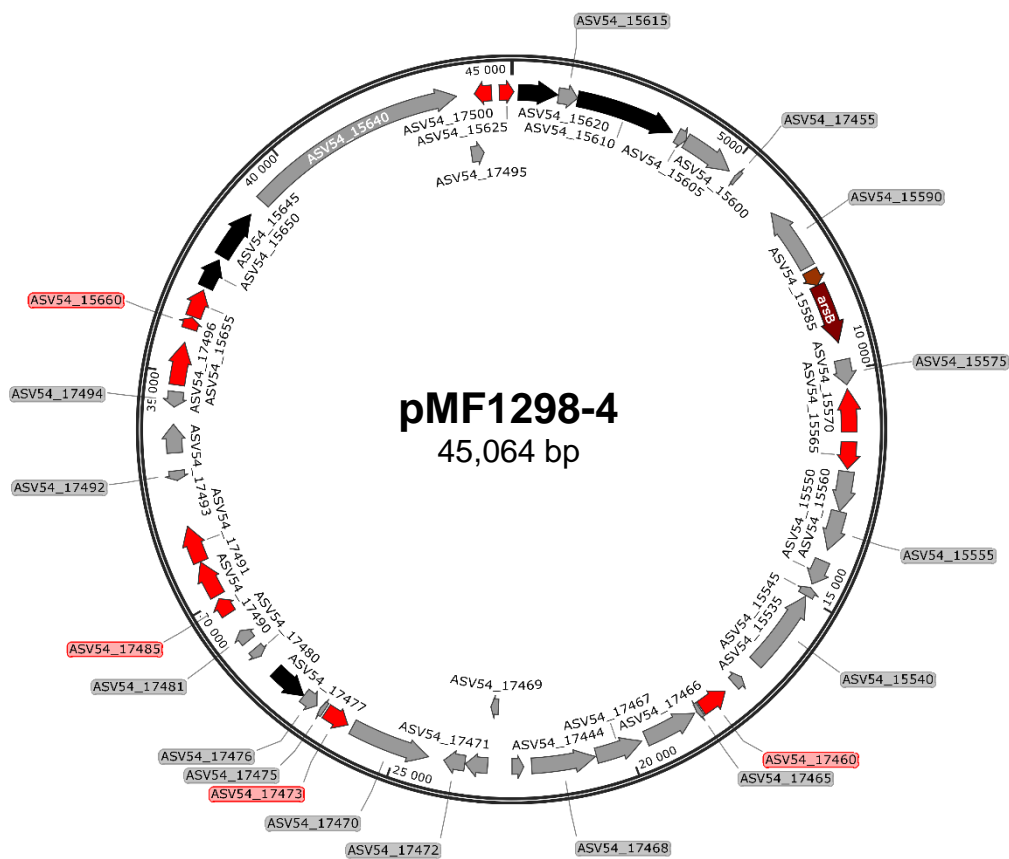

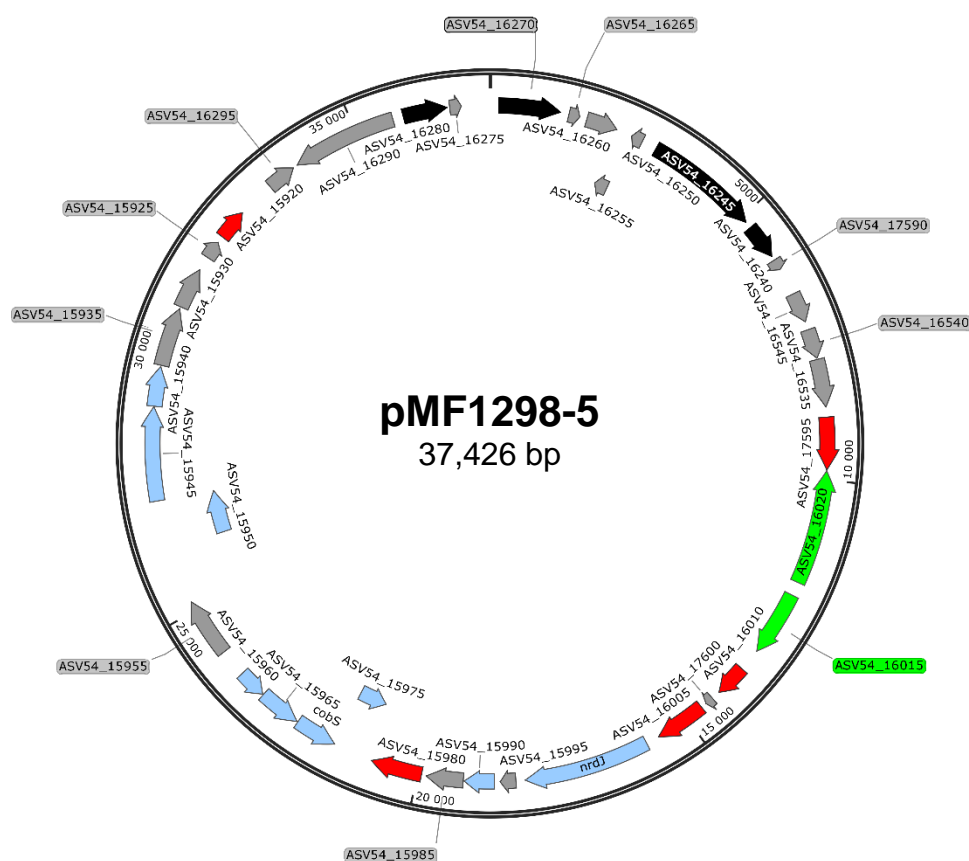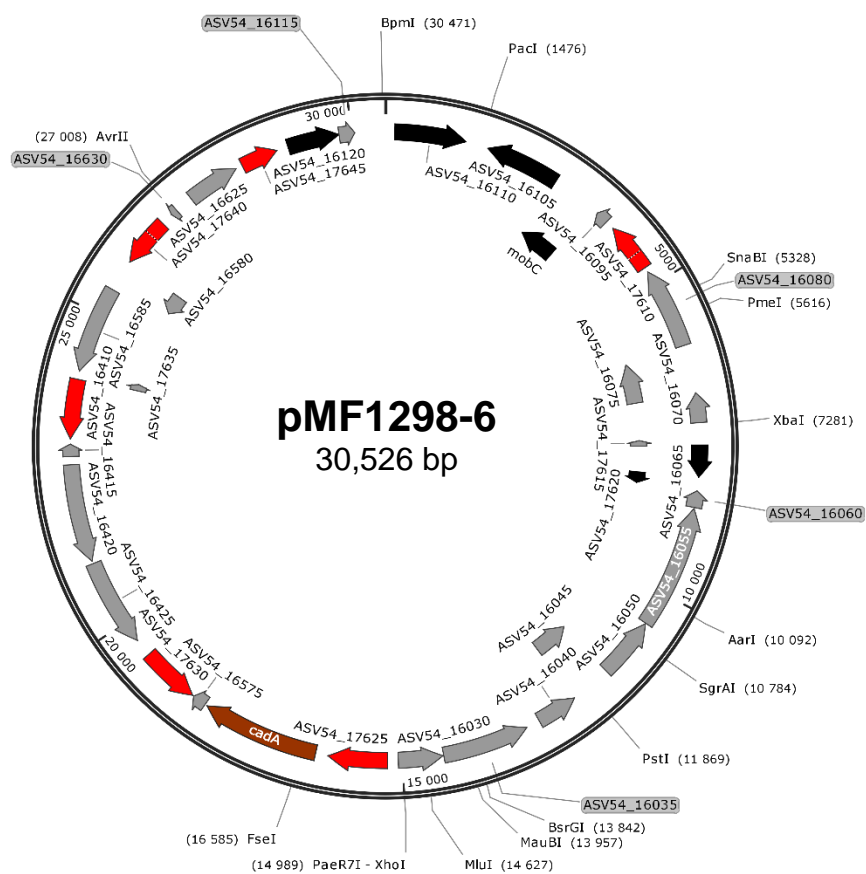

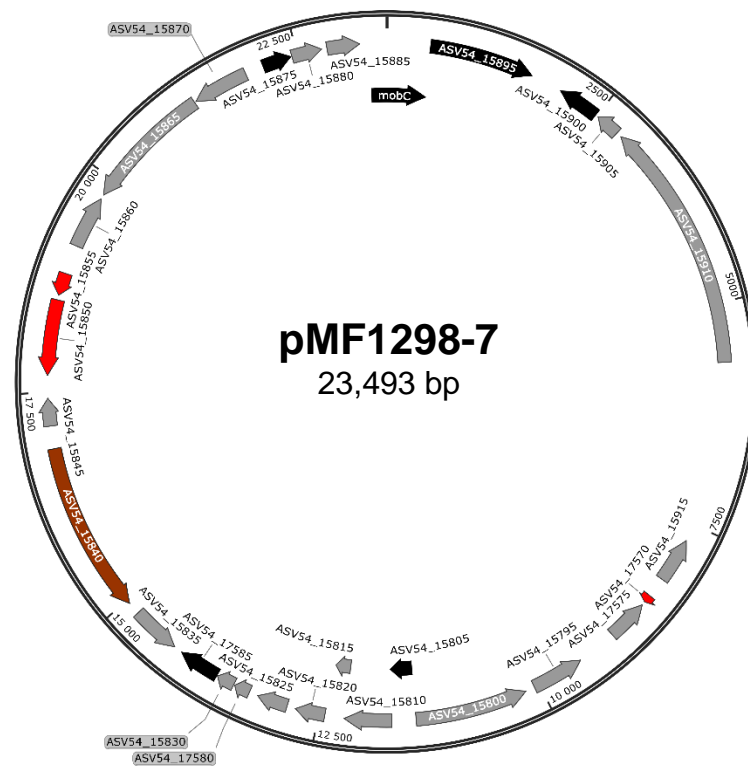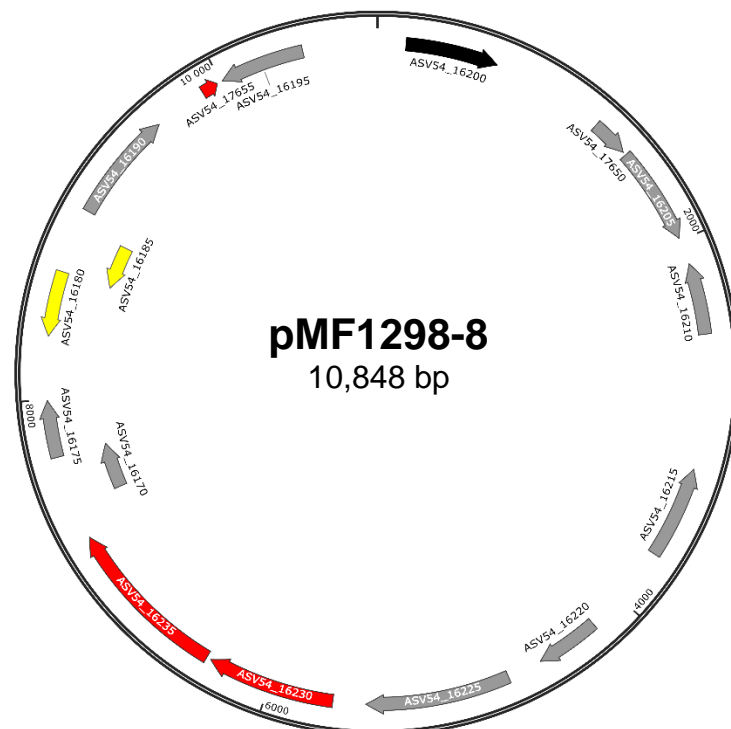

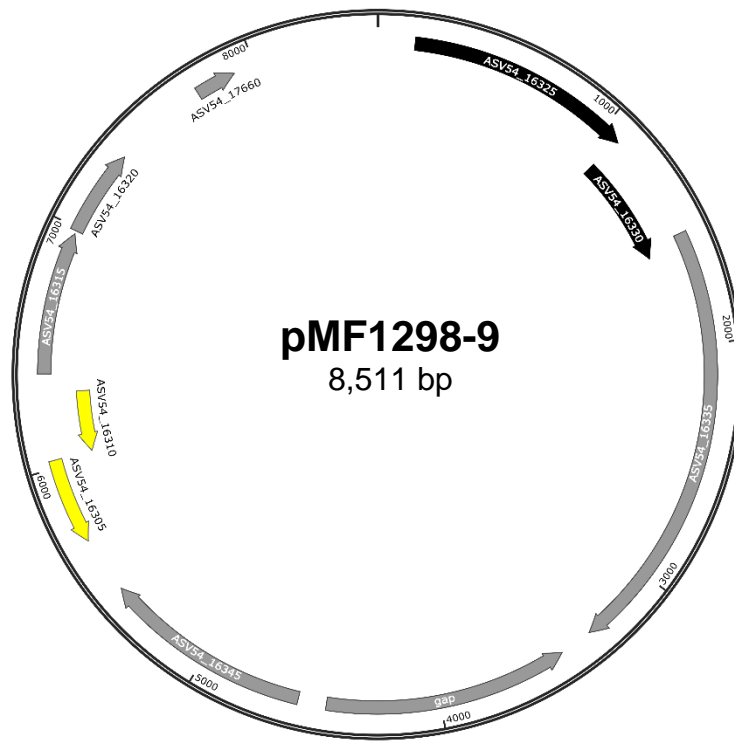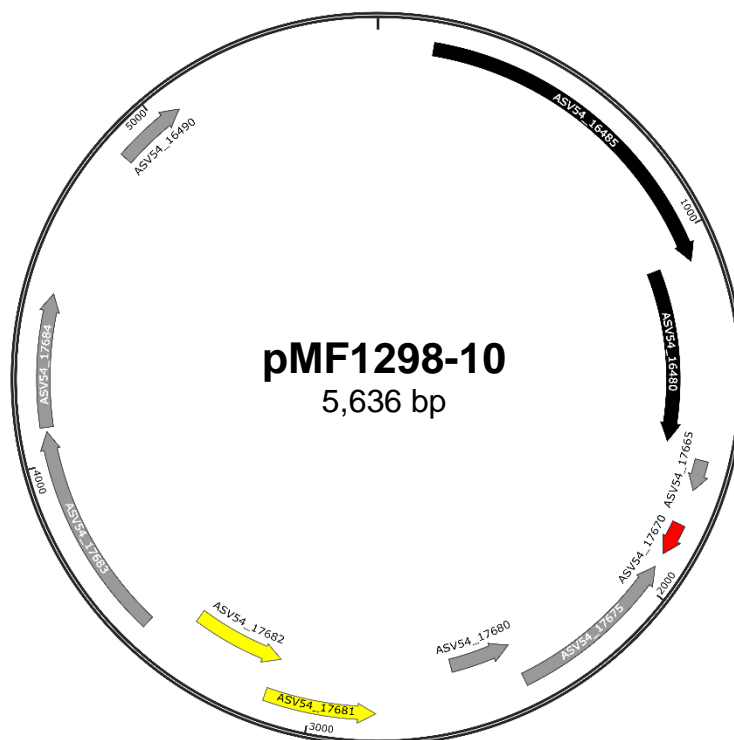

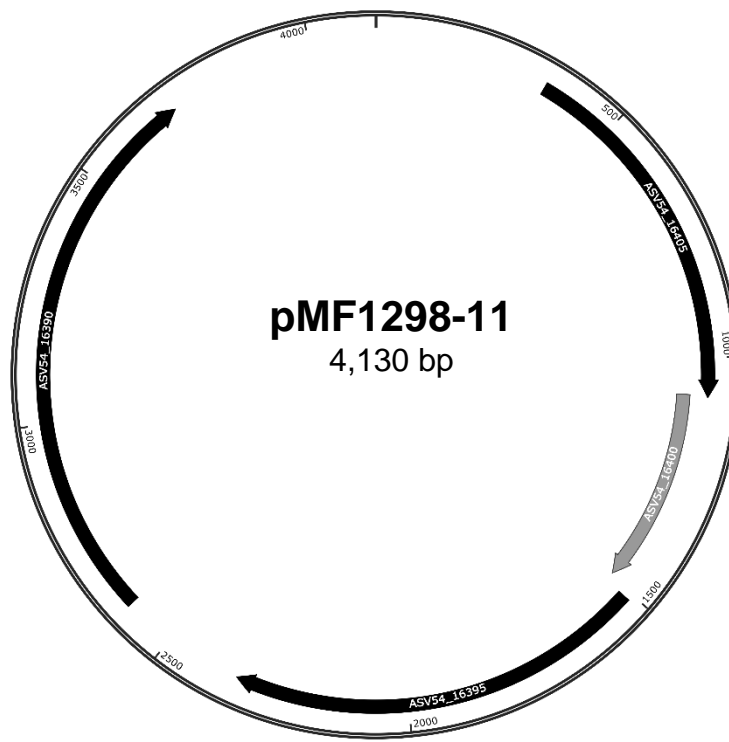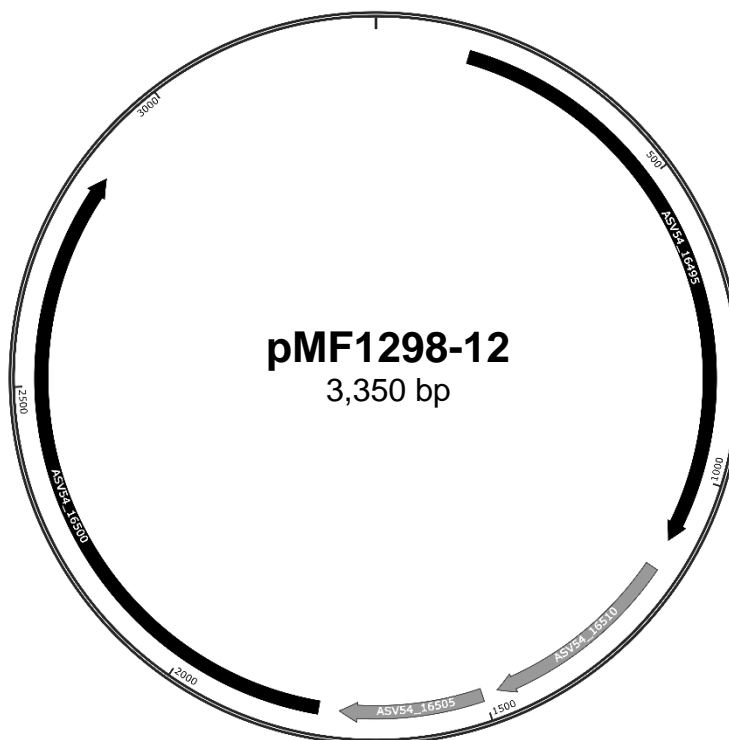

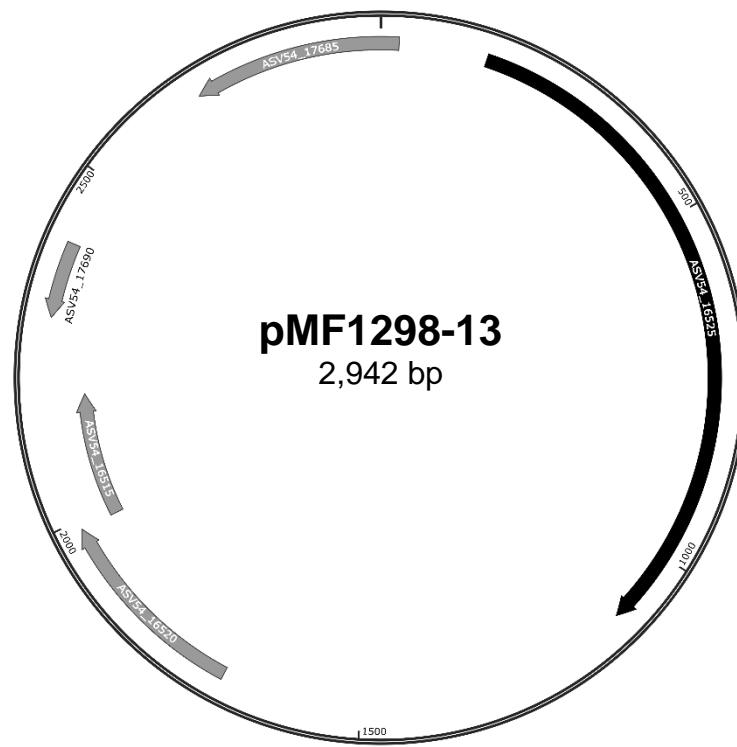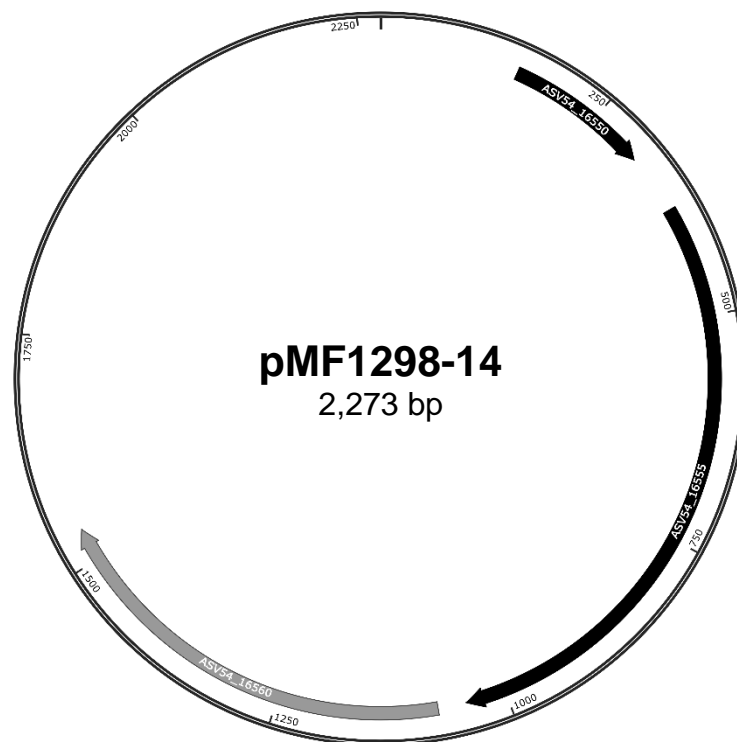

Supplement: s1 [file s1]
