# Supplementary material for: Large Plasmid Complement Resolved: Complete Genome Sequencing of Lactobacillus plantarum MF1298, a Candidate Probiotic Strain Associated with Unfavorable Effect
Source: MDPI journal article supplement (doi:10.3390/microorganisms7080262), 2019-08-14
Supplement: s1 [file s1]

**TABLE S1** | Sequence coverage.

| GenBank Assembly <sup>1</sup>             | GenBank No. | Type       | Name       | Size (bp) | Average coverage |                         |                         |          |
|-------------------------------------------|-------------|------------|------------|-----------|------------------|-------------------------|-------------------------|----------|
|                                           |             |            |            |           | PacBio           | Illumina-T <sup>2</sup> | Illumina-P <sup>2</sup> | Nanopore |
| GCA_001880185.1<br>and<br>GCA_001880185.2 | CP013149.1  | Chromosome | MF1298     | 3 235 952 | 80x              | 1400x <sup>3</sup>      | -                       | -        |
|                                           | CP013150.1  | Plasmid    | pMF1298-1  | 63 114    | 50x              | 1100x <sup>3</sup>      | -                       | -        |
|                                           | CP013151.1  | Plasmid    | pMF1298-2  | 55 699    | 50x              | 1100x <sup>3</sup>      | -                       | -        |
| GCA_001880185.2                           | CP013153.2  | Plasmid    | pMF1298-3  | 47 476    | -                | 950x <sup>3</sup>       | 443x                    | 729x     |
|                                           | CP013152.2  | Plasmid    | pMF1298-4  | 45 064    | -                | 900x <sup>3</sup>       | 379x                    | 683x     |
|                                           | CP013155.2  | Plasmid    | pMF1298-5  | 37 426    | -                | 1 200x <sup>3</sup>     | 504x                    | 855x     |
|                                           | CP013156.2  | Plasmid    | pMF1298-6  | 30 526    | -                | 1 350x <sup>3</sup>     | 475x                    | 475x     |
|                                           | CP013154.2  | Plasmid    | pMF1298-7  | 23 493    | -                | 1 750x <sup>3</sup>     | 645x                    | 372x     |
|                                           | CP013158.2  | Plasmid    | pMF1298-8  | 10 848    | -                | 3 650x <sup>3</sup>     | 1 784x                  | 179x     |
|                                           | CP013160.2  | Plasmid    | pMF1298-9  | 8 511     | -                | 4 300x <sup>3</sup>     | 2 727x                  | 104x     |
|                                           | CP013166.2  | Plasmid    | pMF1298-10 | 5 636     | -                | 6 050x <sup>3</sup>     | 3 871x                  | 66x      |
|                                           | CP013162.2  | Plasmid    | pMF1298-11 | 4 130     | -                | 12 050x <sup>3</sup>    | 12 492x                 | 109x     |
|                                           | CP013167.2  | Plasmid    | pMF1298-12 | 3 350     | -                | 10 000x <sup>3</sup>    | 13 725x                 | 51x      |
|                                           | CP013168.2  | Plasmid    | pMF1298-13 | 2 942     | -                | 16 300x <sup>3</sup>    | 15 979x                 | 80x      |
|                                           | CP013170.2  | Plasmid    | pMF1298-14 | 2 273     | -                | 12 200x <sup>3</sup>    | 14 616x                 | 48x      |

<sup>1</sup>The initial version 1 (GCA\_001880185.1) of the genome assembly was based on PacBio and Illumina sequencing data of total genomic DNA and consisted of 29 entities. It included three circular units, one large chromosome and two plasmids, as well as 26 linear contigs (the linear contigs are not indicated in this table). The three circular units remain unchanged to the second version (Version 2; GCA\_001880185.2), consisting of 15 entities, included MinION and Illumina sequencing data of a plasmid DNA enriched fraction which facilitated recovery of complete plasmid structures, and thus in total 14 plasmids were resolved.

<sup>2</sup>Note that the Illumina sequencing of total genomic DNA (Illumina-T) is separate from the Illumina sequencing of plasmid pMF1298-3 to 14 (Illumina-P).

<sup>3</sup>Approximate values based on the complete Illumina assembly of the total genomic DNA, mapped to the MF1298 chromosome and resolved plasmid entities.
